# Supplementary material
Source: publisher figshare collection journal article supplement (https://acs.figshare.com/ndownloader/files/4283202)
Supplement: Supplementary file 1 [file 4283202]

# Transparent Cellulose Films with High Gas Barrier Properties Fabricated from Aqueous Alkali/Urea Solutions

Quanling Yang,<sup>†</sup> Hayaka Fukuzumi,<sup>†</sup> Tsuguyuki Saito,<sup>†</sup> Akira Isogai,<sup>\*†</sup> and Lina Zhang<sup>‡</sup>

<sup>†</sup>Department of Biomaterial Sciences, Graduate School of Agricultural and Life Sciences, University of Tokyo, 1-1-1 Yayoi, Bunkyo-ku, Tokyo 113-8657, Japan

<sup>‡</sup>Department of Chemistry, Wuhan University, Wuhan 430072, China

E-mail: aisogai@mail.ecc.u-tokyo.ac.jp

## Supporting Information

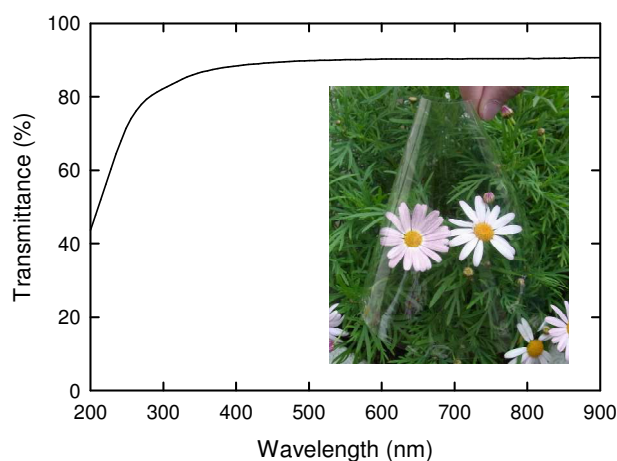

**Figure S1.** UV-Vis transmittance and appearance of an approximately 50  $\mu\text{m}$  thick cellulose film prepared from 5 wt % FP cellulose solution in NaOH/urea/ $\text{H}_2\text{O}$  by regeneration with 5 wt %  $\text{H}_2\text{SO}_4$  at 0  $^\circ\text{C}$ .

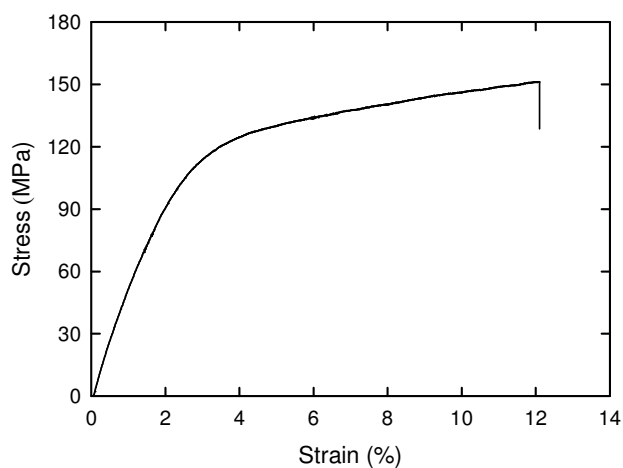

**Figure S2.** Stress-strain curve of cellulose film prepared from 5 wt % FP cellulose solution in NaOH/urea/H<sub>2</sub>O by regeneration with 5 wt % H<sub>2</sub>SO<sub>4</sub> at 0 °C.

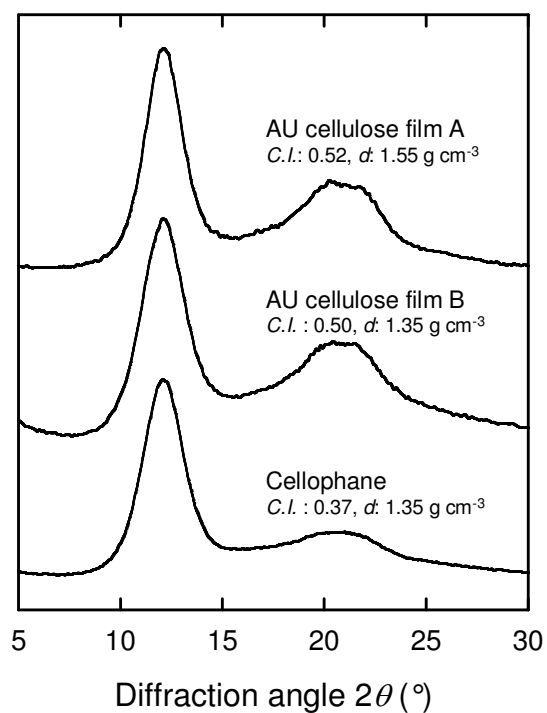

**Figure S3.** XRD patterns of AU cellulose films prepared from 6 wt % FP cellulose solution by regeneration with acetone at 20 °C (AU cellulose film A), from 5 wt % FP cellulose solution by regeneration with 5 wt % H<sub>2</sub>SO<sub>4</sub> at 60 °C (AU cellulose film B), and that of cellophane. *C.I.*: crystallinity index; *d*: density.
